# Supplementary material for: Start from the source: direct treatment of a degraded LiFePO4 cathode for efficient recycling of spent lithium-ion batteries
Source: Royal Society of Chemistry journal article supplement (doi:10.1039/d2gc02652j), 2022-01-01
Supplement: d2gc02652j1.pdf [file d2gc02652j1.pdf]

## ***Supporting information***

### **Start from the source: Direct treatment of degraded LiFePO<sub>4</sub> cathode for efficient recycling of spent lithium-ion batteries**

Yunlong Xu<sup>a</sup>, Xuejing Qiu<sup>b</sup>, Baichao Zhang<sup>a</sup>, Andi Di<sup>c</sup>, Wentao Deng<sup>a</sup>, Guoqiang  
Zou<sup>a</sup>, Hongshuai Hou<sup>a</sup>, Xiaobo Ji<sup>a,\*</sup>

<sup>a</sup> College of Chemistry and Chemical Engineering  
Central South University  
Changsha 410083, China

<sup>b</sup> School of environmental engineering  
Henan university of technology  
Henan 450001, China

<sup>c</sup> Max Planck Institute for Chemical Energy Conversion  
Mülheim 45470, Germany

E-mail: xji@csu.edu.cn

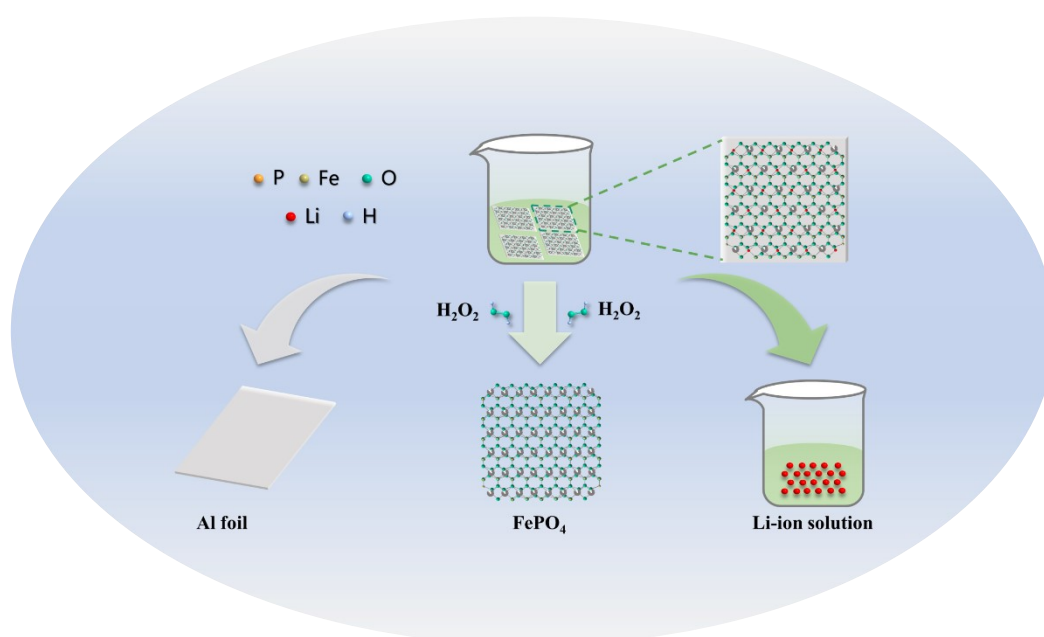

Fig. S1 The schematic diagram of one-step oxidation leaching by hydrogen peroxide.

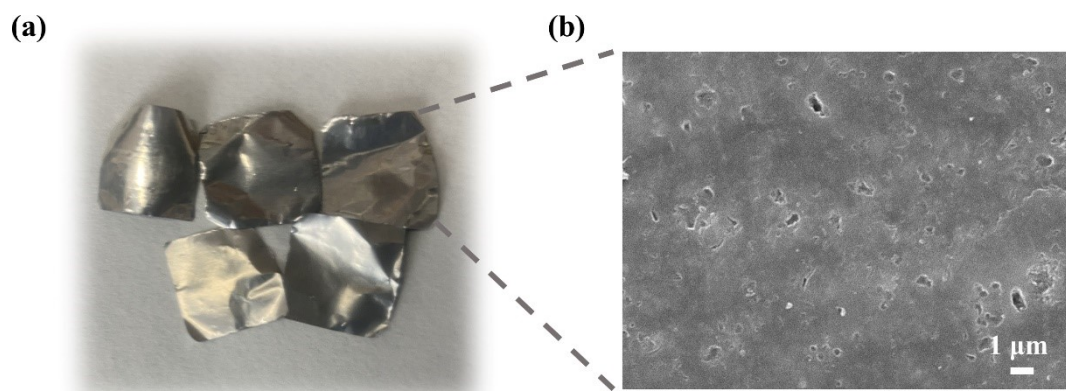

Fig. S2 (a) The picture and (b) SEM image of the stripped aluminum foil.

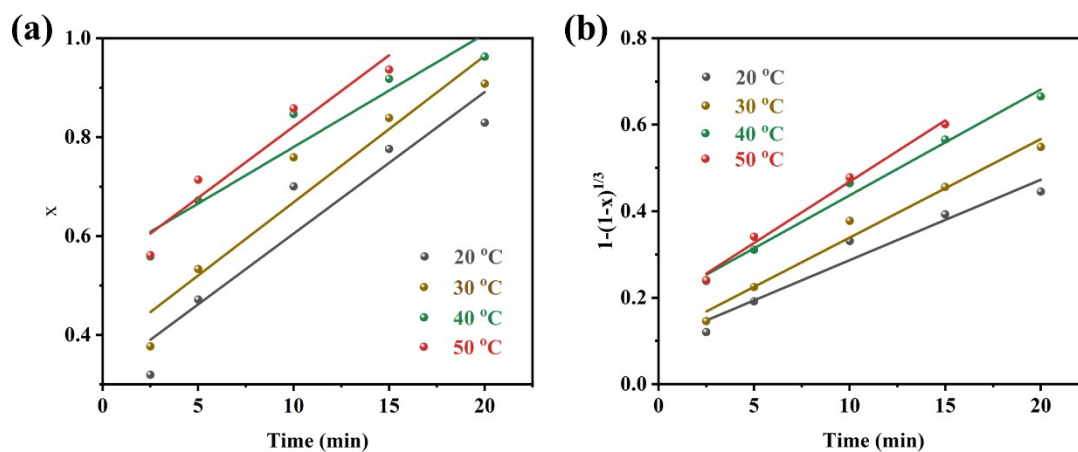

Fig. S3 Kinetics fitting diagram at different temperature for (a) external diffusion model and (b) chemical reaction model.

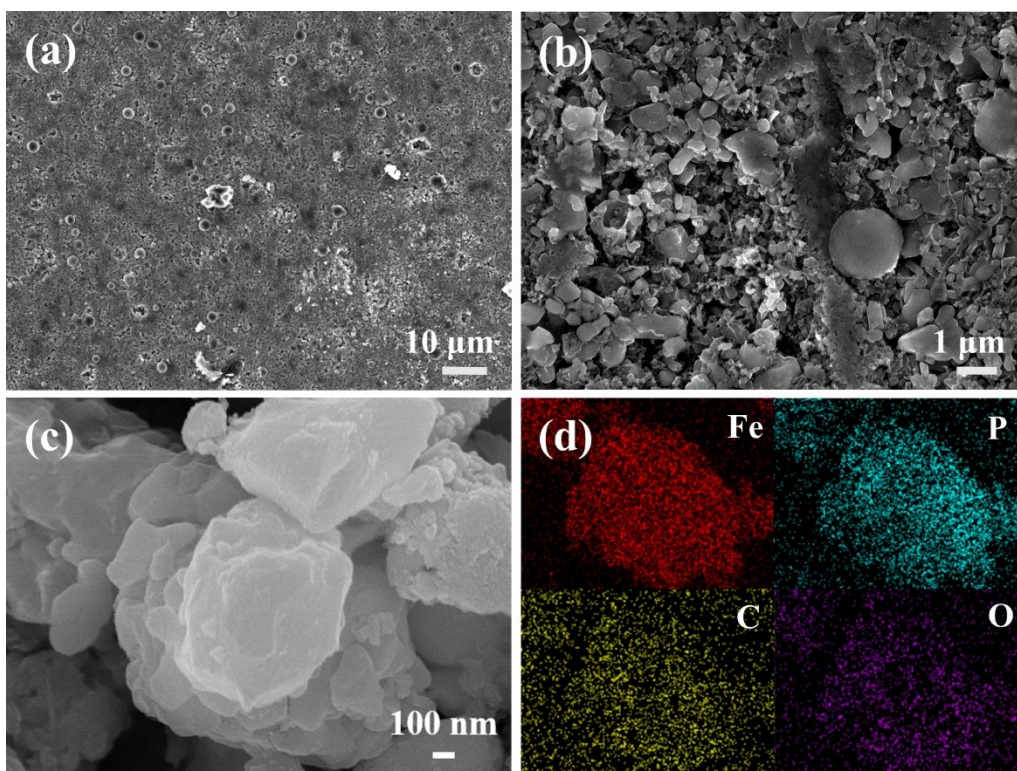

Fig. S4 (a, b, c) SEM images and (d) Elemental mapping of the spent  $\text{LiFePO}_4$  cathode sheets.

Table S1 The main elements content of the spent  $\text{LiFePO}_4$  cathode sheets.

| Element         | Li   | Fe    | Al    | P     |
|-----------------|------|-------|-------|-------|
| Content (wt. %) | 4.35 | 42.13 | 28.56 | 21.71 |

#### Text S1 Principle and calculation formula of leaching kinetics

In the process of leaching by hydrometallurgy, the reaction principle between solid reactants and leaching solution confirms to be typical shrinking core models. According to this theory, the chemical reaction step mainly takes place at the interface of the unreacted nucleus, and the leaching process is gradually from the external solution to the interior of the unreacted particle, while the diffusion process of the leachate is opposite. The leaching steps are as follows:

- (1) The leaching agent diffuses through the solution to the surface of the solid reactant particles, represented as external diffusion step.
- (2) The leaching agent passes through the solid product layer to the surface of the unreacted nucleus, represented as internal diffusion step.
- (3) The leaching agent reacts on the surface of the solid reactant, represented as chemical reaction step.
- (4) The leachate reaches the surface of the solid reactant particles from the reaction interface through the solid product layer.
- (5) The leachate diffuses from the surface of the solid reactant particles back into the solution.

When external diffusion, internal diffusion and chemical reaction are respectively the rate control steps of leaching process, the leaching kinetics equations are shown in equations (1) – (3).

$$x = k_1 t \quad (1)$$

$$1 - 2/3x - (1 - x)^{2/3} = k_2 t \quad (2)$$

$$1 - (1 - x)^{1/3} = k_3 t \quad (3)$$

Where  $x$  represents the leaching efficiency of Li (%),  $k_1$ ,  $k_2$ ,  $k_3$  represent the reaction rate constants in each situation ( $\text{min}^{-1}$ ),  $t$  represents the oxidation time (min).

Table S2 The leaching result of Li<sup>+</sup> at different temperatures and different time.

| Temperature(°C)<br>Time (min) | Leaching efficiency (%) |      |      |      |      |      |
|-------------------------------|-------------------------|------|------|------|------|------|
|                               | 2.5                     | 5    | 10   | 15   | 20   | 30   |
| 20                            | 31.9                    | 47.2 | 70.1 | 77.6 | 82.9 | 84.1 |
| 30                            | 37.7                    | 53.3 | 75.9 | 83.9 | 90.8 | 88.9 |
| 40                            | 55.9                    | 67.2 | 84.7 | 91.8 | 96.3 | 96.8 |
| 50                            | 56.1                    | 71.4 | 85.8 | 93.7 | 94.5 | 94.1 |



Table S3 The kinetics fitting data of  $x$  at different temperatures varies with time.

| Kinetics fitting data         |        |        |        |        |        |        |
|-------------------------------|--------|--------|--------|--------|--------|--------|
| Temperature(°C)<br>Time (min) | 2.5    | 5      | 10     | 15     | 20     | 30     |
| 20                            | 0.3194 | 0.4715 | 0.7005 | 0.7760 | 0.8291 | 0.8410 |
| 30                            | 0.3768 | 0.5332 | 0.7591 | 0.8388 | 0.9078 | 0.8890 |
| 40                            | 0.5587 | 0.6720 | 0.8465 | 0.9180 | 0.9625 | 0.9680 |
| 50                            | 0.5613 | 0.7138 | 0.8580 | 0.9365 | 0.9453 | 0.9410 |

Table S4 The kinetics fitting data of  $1-2/3x-(1-x)^{2/3}$  at different temperatures varies with time.

| Kinetics fitting data         |        |        |        |        |        |        |
|-------------------------------|--------|--------|--------|--------|--------|--------|
| Temperature(°C)<br>Time (min) | 2.5    | 5      | 10     | 15     | 20     | 30     |
| 20                            | 0.0133 | 0.0320 | 0.0854 | 0.1138 | 0.1393 | 0.1458 |
| 30                            | 0.0192 | 0.0428 | 0.1068 | 0.1446 | 0.1907 | 0.1764 |
| 40                            | 0.0479 | 0.0764 | 0.1450 | 0.1993 | 0.2563 | 0.2539 |
| 50                            | 0.0484 | 0.0898 | 0.1558 | 0.2165 | 0.2257 | 0.2211 |

Table S5 The kinetics fitting data of  $1-(1-x)^{1/3}$  at different temperatures varies with time.

| Kinetics fitting data         |        |        |        |        |        |        |
|-------------------------------|--------|--------|--------|--------|--------|--------|
| Temperature(°C)<br>Time (min) | 2.5    | 5      | 10     | 15     | 20     | 30     |
| 20                            | 0.1204 | 0.1915 | 0.3309 | 0.3927 | 0.4451 | 0.4582 |
| 30                            | 0.1458 | 0.2243 | 0.3778 | 0.4558 | 0.5482 | 0.5194 |
| 40                            | 0.2387 | 0.3104 | 0.4646 | 0.5656 | 0.6653 | 0.6825 |
| 50                            | 0.2402 | 0.3410 | 0.4783 | 0.6010 | 0.6204 | 0.6107 |

Table S6 The fitting data of different kinetic models at different leaching temperatures.

| Kinetic models     | 20 °C   |                | 30 °C   |                | 40 °C   |                | 50 °C   |                |
|--------------------|---------|----------------|---------|----------------|---------|----------------|---------|----------------|
|                    | Slope   | R <sup>2</sup> |
| External diffusion | 0.02863 | 0.89900        | 0.02962 | 0.91392        | 0.02286 | 0.91748        | 0.02885 | 0.93373        |
| Internal diffusion | 0.00737 | 0.97709        | 0.00985 | 0.99224        | 0.01198 | 0.99826        | 0.01332 | 0.99692        |
| Chemical reaction  | 0.01860 | 0.95161        | 0.02278 | 0.97830        | 0.02447 | 0.98948        | 0.02833 | 0.99156        |

# Text S2 Electrochemical impedance spectroscopy (EIS)

The semi-circle part and the straight part of the Nyquist plot represent the high frequency region and the low frequency region, respectively. The low frequency region line is equivalent to the lithium-ion diffusion impedance, and the lithium-ion diffusion coefficient can be obtained by slope calculation. Equations are as follows:

$$Z' = K + \sigma \omega^{-1/2} \quad (4)$$

$$D_{Li} = \frac{R^2 T^2}{2n^2 F^4 A^2 C^2 \sigma^2} \quad (5)$$

In Equation (4),  $Z'$  represents the real part of impedance,  $\sigma$  represents the Warburg coefficient,  $\omega$  is the angular frequency. In Equation (5),  $D_{Li}$  represents the lithium-ion diffusion coefficients ( $\text{cm}^2 \text{s}^{-1}$ ),  $R$  represents gas constant ( $8.314 \text{ J mol}^{-1} \text{ K}^{-1}$ ),  $T$  represents the absolute temperature (K),  $n$  represents the electron transfer number of  $\text{LiFePO}_4$  molecules during lithium intercalation (1.0),  $F$  represents Faraday constant ( $96485 \text{ C mol}^{-1}$ ),  $A$  represents the surface area of the electrode ( $1.54 \text{ cm}^2$ ),  $C$  represents the concentration of  $\text{Li}^+$  in LFP ( $2.28 \times 10^{-2} \text{ mol cm}^{-3}$ ),  $\sigma$  represents the slope of  $Z' \sim \omega^{-1/2}$ .

Table S7 The data from calculating lithium-ion diffusion coefficients based the lines of  $Z' \sim \omega^{-1/2}$  for R-LFP and S-LFP

|                                      | R-LFP                    | S-LFP                    |
|--------------------------------------|--------------------------|--------------------------|
| Slope                                | 31.2203±0.3922           | 126.3310±0.9648          |
| Intercept                            | 145.7437±0.4241          | 332.2629±1.0431          |
| R <sup>2</sup>                       | 0.9987                   | 0.9995                   |
| $D_{Li} (\text{cm}^2 \text{s}^{-1})$ | $2.9471 \times 10^{-14}$ | $1.7999 \times 10^{-15}$ |

### Text S3 Economic analysis

Based on 1.0 kg spent  $\text{LiFePO}_4$  batteries, the total investment and profits in the recycling process were calculated in detail. It is estimated that 358 g cathode sheets could be obtained from the treatment of 1.0 kg spent  $\text{LiFePO}_4$  batteries, including 40.57 g aluminum foil. According to the button cells which are composed of R-LFP powder, super P and polyvinylidene fluoride (PVDF) binder in a ratio of 8:1:1 mixed with appropriate N-methyl pyrrolidone (NMP) as solvent, 285.69 g R-LFP could be gained in the end.

Chemicals such as  $\text{H}_2\text{O}_2$  (20% vol),  $\text{LiOH}$  and  $\text{Na}_2\text{CO}_3$  were consumed in the whole recycling process, and R-LFP,  $\text{Li}_2\text{CO}_3$  and aluminum foil were recycled and considered as profits. In addition, the costs of electricity and wastewater treatment are also taken into account in the economic analysis. The cost and profit of this recycling strategy are detailed in Table S8.

Table S8 The cost and profit of recycling 1.0 kg spent LiFePO<sub>4</sub> batteries.

|             | Chemical                                | Price                      | Dosage                 | Total    |
|-------------|-----------------------------------------|----------------------------|------------------------|----------|
| Consumption | S-LFP                                   | 1 \$/kg                    | 1.0 kg                 | 1.0 \$   |
|             | H <sub>2</sub> O <sub>2</sub> (20% vol) | 0.14 \$/L                  | 19 L                   | 2.66 \$  |
|             | LiOH                                    | 14.42 \$/kg                | 0.076 kg               | 1.096 \$ |
|             | Na <sub>2</sub> CO <sub>3</sub>         | 0.225 \$/kg                | 0.092 kg               | 0.021 \$ |
|             | Electricity                             | 0.08 \$/kw·h <sup>-1</sup> | 2.2 kw·h <sup>-1</sup> | 0.176 \$ |
|             | Wastewater                              | 0.10 \$/m <sup>3</sup>     | 19 L                   | 1.9 \$   |
| Total       | 6.853 \$                                |                            |                        |          |
|             | Chemical                                | Price                      | Dosage                 | Total    |
| Product     | R-LFP                                   | 23.29 \$/kg                | 0.286 kg               | 6.661 \$ |
|             | Li <sub>2</sub> CO <sub>3</sub>         | 24.94 \$/kg                | 0.064 kg               | 1.596 \$ |
|             | Aluminum foil                           | 3.71 \$/kg                 | 0.041 kg               | 0.152 \$ |
| Total       | 8.409 \$                                |                            |                        |          |
| Profit      | 1.556 \$                                |                            |                        |          |

## References

1. P. Meshram, B. D. Pandey and T. R. Mankhand, *Chem. Eng. J.*, 2015, **281**, 418-427.
2. L. Yang, Y. Tian, J. Chen, J. Gao, Z. Long, W. Deng, G. Zou, H. Hou and X. Ji, *J. Mater. Chem. A*, 2021, **9**, 24686-24694.
3. D. Peng, J. Zhang, J. Zou, G. Ji, L. Ye, D. Li, B. Zhang and X. Ou, *J. Clean. Prod.*, 2021, **316**, 128098.
4. X. Qiu, B. Zhang, Y. Xu, J. Hu, W. Deng, G. Zou, H. Hou, Y. Yang, W. Sun, Y. Hu, X. Cao and X. Ji, *Green Chem.*, 2022, **24**, 2506-2515.
5. P. Xu, Q. Dai, H. Gao, H. Liu, M. Zhang, M. Li, Y. Chen, K. An, Y. S. Meng, P. Liu, Y. Li, J. S. Spangenberg, L. Gaines, J. Lu and Z. Chen, *Joule*, 2020, **4**, 2609-2626.
